# Supplementary material
Source: Springer Nature journal article supplement (https://www.springermedizin.de/resource/supplementary/13058_2014_3396_MOESM7_ESM.pdf/9704088)

Ki67

p16ink4a

RB

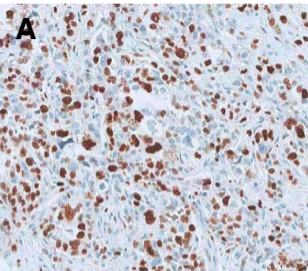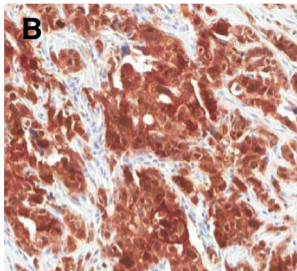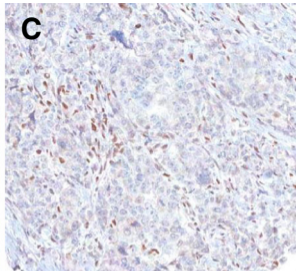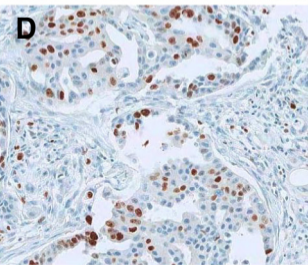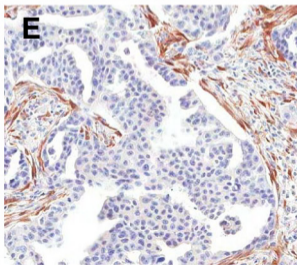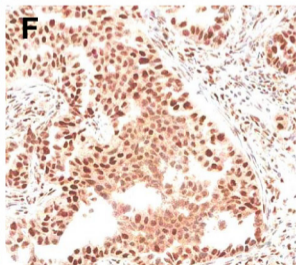

Supplement: MOESM7 [file 9704088]
